# Supplementary material
Source: PubMed Central journal article supplement (PMC2638444)
Supplement: ern137_1.pdf [file ern137_1.pdf]

## Over-expression of a zeatin O-glucosylation gene in maize leads to growth retardation and tasselseed formation

Albert Pineda Rodo, Norbert Brugière, Radomira Vankova, Jiri Malbeck, Jaleh M. Olson, Sara C. Haines, Ruth C. Martin, Jeffrey E. Habben, David W.S. Mok and Machteld C. Mok

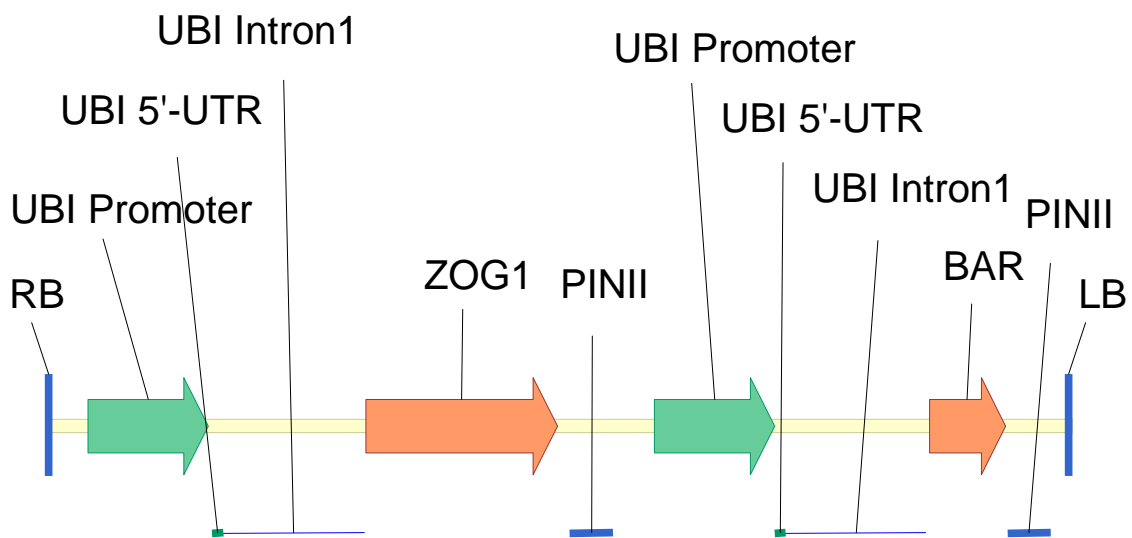

**Fig. S1.** Construct used for transformation of maize with the ZOG1 gene. RB, right border; UBI, ubiquitin; PINII, proteinase inhibitor II; BAR, bialaphos resistance, phosphinothricin acetyltransferase; LB, left border.

### Additional Reference:

Keil M, Sanchez-Serrano J, Schell J, Willmitzer L. 1986. Primary structure of a proteinase inhibitor II gene from potato (*Solanum tuberosum*). *Nucl. Acids Research* 14, 5641-5650.
